# Supplementary material
Source: PubMed Central journal article supplement (PMC5692562)
Supplement: pnas.201710308SI.pdf [file pnas.201710308SI.pdf]

# Supporting Information

Espinosa-Medina et al. 10.1073/pnas.1710308114

## SI Materials and Methods

**Histology.** Whole chicken and mice guts were fixed for 1 h in 4% paraformaldehyde (in PBS), permeabilized in 1% Triton (in PBS) for 30 min and incubated over night at 4 °C with primary antibodies in blocking solution (1% DMSO, 0.1% Triton in PBS, 20% FCS). After extensive washes in blocking solution, whole guts were incubated over night at 4 °C, with secondary antibodies in blocking solution. After several washes in 0.1% Triton in PBS, samples were cleared in Glycerol 80% in PBS.

Whole chicken chimeras were cleared using ScaleA2 solution as previously described (48). Samples were imaged using a SP8 or SP5 confocal microscope (Leica). Three-dimensional reconstructions and videos were obtained using the IMARIS imaging software. In situ hybridization and immunocytochemistry have been described previously (44). Immunofluorescence on cryostat sections was performed as previously described (18). Whole-mount immunofluorescent staining using the 3DISCO method was performed as previously described (31).

**Image Generation and Processing.** Samples were imaged using a SP8 or SP5 confocal microscope (Leica). Whole-embryo images were obtained by tile-scanning with a 20 $\times$ -immersion objective and automatic stitching on a Leica SP8 confocal. Three-dimensional reconstructions and videos were obtained using the IMARIS imaging software. Note that the rendering process in IMARIS sometimes leads to the appearance of horizontal or vertical splices in the final whole-embryo images, which are processing artifacts. GFP/TH overlap panels in Fig. S6 are binary masks generated using the ImageJ software. Each .lif confocal file was first converted into .tiff, then run through a customized Macro involving the following processing steps: (i) background subtraction of the whole image; (ii) “despeckling”; (iii) “autothresholding”; (iv) binary mask generation (selection of the area of interest exclusively, i.e. the ganglion area); and (v) image calculator: calculates final binary image of the colocalized GFP/TH surfaces.

**Antibodies and Probes.** Antibodies and probes were as follows:

- $\alpha$ -2H3 (NF), mouse, 1:500, Hybridoma Bank (#2H3);
- $\alpha$ -bIII Tubulin (Tuj1), mouse, 1:500, Covance (#MMS-435P);
- $\alpha$ -Phox2b, rabbit, 1:500 (20);
- $\alpha$ -Phox2b, guinea pig, 1:500 (48);
- $\alpha$ -Sox10, goat, 1:250, Santa Cruz (#SC-17342);
- $\alpha$ - $\beta$ gal, rabbit, 1:400, Cappel (#55976);
- $\alpha$ -HuC/D mouse, 1:200, Invitrogen (MABN153);
- $\alpha$ -GFP, chicken, 1:500, Aveslab (#GFP-1020);
- $\alpha$ -HNK-1, mouse, 1:50, Hybridoma Bank (#3H5);
- $\alpha$ -TH, rabbit, 1:800, Merck (#AB152);
- $\alpha$ -rabbit Cy3, 1:500, Jackson Immunoresearch Laboratories (#711-165-152);
- $\alpha$ -rabbit A488, 1:500, Jackson Immunoresearch Laboratories (#711-545-152);
- $\alpha$ -goat Cy3, 1:500, Jackson Immunoresearch Laboratories (#705-166-147);
- $\alpha$ -goat A647, 1:500, Jackson Immunoresearch Laboratories (#705-606-147);

$\alpha$ -mouse Cy3, 1:500, Jackson Immunoresearch Laboratories (#715-165-150);

$\alpha$ -mouse A488, 1:500, Invitrogen (#A-21202);

$\alpha$ -guinea pig Cy3, 1:500, Invitrogen (#A-11073);

$\alpha$ -chicken A488, 1:500, Jackson Immunoresearch Laboratories (#103-545-155).

Immunohistochemical reactions were processed with the Vectastain Elite ABC kits (PK-6101 and PK-6012; Vector Laboratories) as indicated by the manufacturer and color development was performed using DAB.

The probes for Cadherin19 and PLP-1 (cDNA from Source Bioscience, clones #IRCKp5014H0217Q and #IRAVp968G0365D, respectively) were synthesized following the distributor's information. The other probe used was *Peripherin* (obtained from M. M. Portier, Collège de France, Paris).

**Transgenic Mouse Lines.** Mouse lines used were as follows:

*Phox2b::Cre*(50): BAC transgenic line expressing Cre under the control of the *Phox2b* promoter.

*Phox2b<sup>LacZ/+</sup>* (17): Knockin line expressing the reporter gene *LacZ* from the second exon of the *Phox2b* locus, which is disrupted and lead to a null phenotype in *Phox2b<sup>LacZ/LacZ</sup>* embryos.

*Ret<sup>fl-CFP/+</sup>* (51): Knockin line comprising floxed human *Ret9* cDNA and CFP reporter in the first exon of the mouse *Ret* locus. Activation of Cre recombinase results in the removal of floxed *Ret9*, generating a CFP-knockin (*Ret*-null) allele.

*Wnt1::Cre*(52): Transgenic line expressing Cre under the control of the 3' enhancer of *Wnt1*.

*Pgk::Cre* (53): Transgenic line expressing Cre in the germ line.

*Phox2a<sup>ASIC2a</sup>* (*P2aASIC*) (18): Knockin line expressing the toxic G430 mutant of the ASIC2a cation channel upon Cre recombination under the control of *Phox2a* promoter.

*ErbB3<sup>f</sup>* (*ErbB3<sup>Lox/Lox</sup>*) (54): Activation of Cre recombinase results in the removal of floxed *ERBB3*, generating a *ErbB3*-null allele, which lacks the same coding sequences as the previously described *ErbB3 $\Delta$* allele (55).

*Nrg1<sup>tm3Cbm</sup>* (*Nrg1<sup>Lox/Lox</sup>*) (56): A floxed allele of the *Nrg-1* gene containing loxP sites flanking exons 7 (containing sequence alterations), 8 and 9 was generated. Activation of Cre recombinase results in the removal of floxed *Nrg1*, generating a *Nrg-1* null allele.

*Neuregulin<sup>ΔEGF-lacZ</sup>* (*Nrg<sup>LacZ/+</sup>*) (57, 58): Knock in line expressing the reporter gene *LacZ* from the exon of the *Neuregulin1* locus.

All animal studies were done in accordance with the guidelines issued by the French Ministry of Agriculture and have been approved by the Direction Départementale des Services Vétérinaires de Paris.

**Statistical Analyses.** For esophageal neuronal counting, transverse sections of whole E13.5 embryos where immunostained for *Phox2b* and one section of three was selected. The total number of *Phox2b<sup>+</sup>* cells in the esophageal walls was recorded using FIJI Cell Counter.









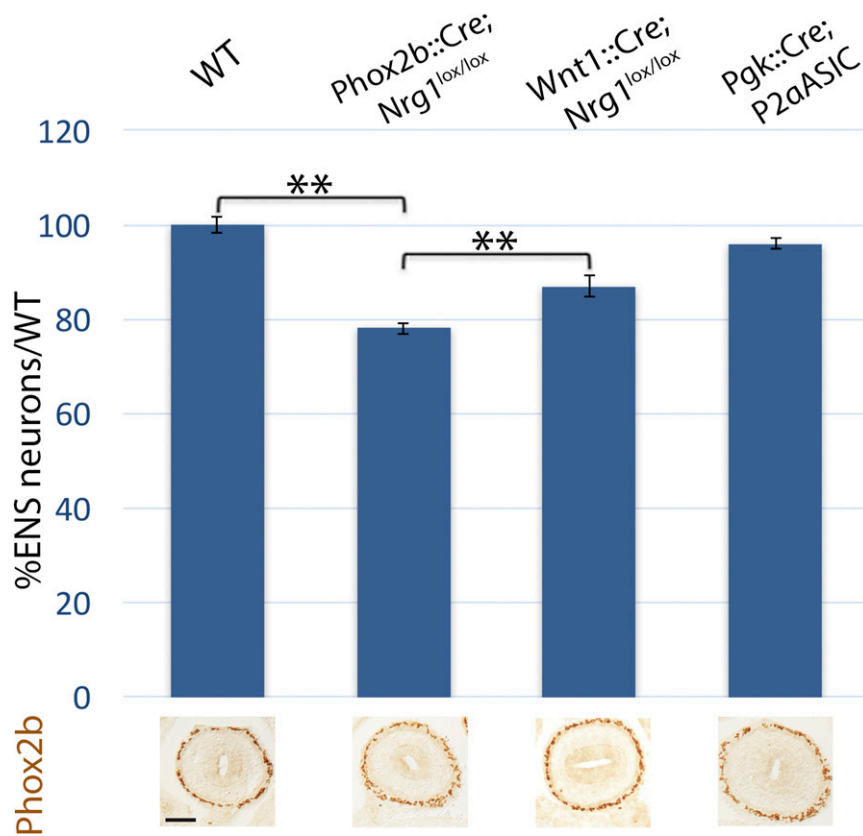

**Fig. 54.** Consequences on the postgastric ENS of the deletion of the vagus nerve or abrogation of its expression of *Nrg1*. (Upper) Quantitative analysis (see *Methods*) of the surface occupied by Phox2b<sup>+</sup> ENS neurons in the indicated mutant backgrounds. *Phox2b::Cre;Nrg1<sup>lox/lox</sup>* embryos have a mild atrophy of the postgastric ENS ( $79 \pm 1.1\%$ /wild-type,  $P = 0.0047$ ;  $n = 9$ ; and  $90 \pm 2\%$ /*Wnt1::Cre;Nrg1<sup>lox/lox</sup>*,  $P = 0.0040$ ;  $n = 5$ ), due to loss of *Nrg1* expression by the vagus nerve, and not by enteric precursors, as shown by the lack of phenotype in *Wnt1::Cre;Nrg1<sup>lox/lox</sup>* ( $87 \pm 2.3\%$ /wild-type,  $P = 0.237$ ;  $n = 5$ ). *Pgk::Cre;P2a<sup>ASIC</sup>* have no phenotype ( $93 \pm 1.2\%$ /wild-type,  $P = 0.283$ ;  $n = 4$ ), presumably because genetic deletion of the nerve is less efficient or occurs later than abrogation of its expression of *Nrg1* (and in line with a weaker phenotype in the esophagus) (Fig. 1B). (Lower) Representative transverse sections through the postgastric ENS of the indicated mutant backgrounds, immunostained for Phox2b. (Scale bar: 50  $\mu\text{m}$ .) Error bars indicate SEM; \*\* $P < 0.005$ .







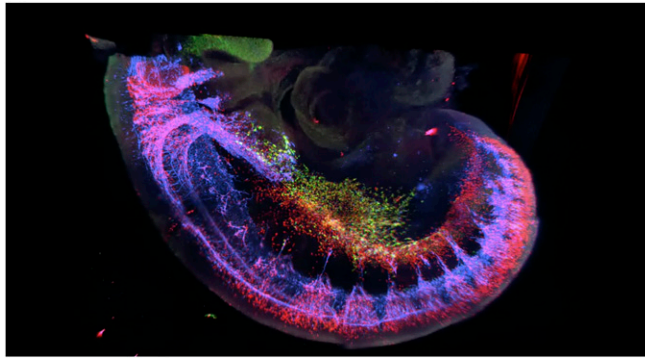

**Movie S1.** Two distinct streams of cells migrate to the esophagus in an E10 mouse embryo. Three-dimensional reconstruction of an E10 *Wnt1::Cre*;*Ret*<sup>CFP/+</sup> embryo. The vagus nerve (NF<sup>+</sup>, blue) projects dorsolaterally from the hindbrain to the foregut accompanied by neural crest cells (Sox10<sup>+</sup>, red). Ahead of the vagus nerve and medially to it, a swarm of neural crest cells emerge from the incipient sympathetic chain toward the foregut. Enteric precursors at the level of the future esophagus express the reporter CFP (green) from the *Ret* promoter. The images were captured with a 20× objective on a SP8 confocal microscope.

[Movie S1](#)
